1           **Trends in suicide rates during the COVID-19**  
2           **pandemic restrictions in a major German city**

3

4

ORIGINAL ARTICLE

5

6           Daniel Radeloff<sup>1\*</sup>, Rainer Papsdorf<sup>1</sup>, Kirsten Uhlig<sup>2</sup>, Andreas Vasilache<sup>3</sup>, Karen

7

Putnam<sup>4</sup>, Kai von Klitzing<sup>1</sup>

8

9           <sup>1</sup> Department of Child and Adolescent Psychiatry, Psychotherapy and

10          Psychosomatics, University Hospital Leipzig, Leipzig, Germany

11          <sup>2</sup> Leipzig Health Authority, Leipzig, Germany

12          <sup>3</sup> Center for German and European Studies (CGES), Faculty of Sociology Bielefeld

13          University, Bielefeld, Germany

14          <sup>4</sup> Department of Psychiatry, University of North Carolina at Chapel Hill, Chapel Hill,

15          United States

16

17          \*Corresponding author: Daniel Radeloff, Department of Child and Adolescent

18          Psychiatry, Psychotherapy and Psychosomatics, University Hospital Leipzig,

19          Liebigstrasse 20a, 04103 Leipzig, Germany e-mail: [daniel.radeloff@medizin.uni-](mailto:daniel.radeloff@medizin.uni-leipzig.de)

20          [leipzig.de](mailto:daniel.radeloff@medizin.uni-leipzig.de), +49 - 34 - 97 2 40 11.

21          All authors declare no conflicts of interest. This study was conducted without external

22          funding.

23 wordcount manuscript: 2036, wordcount abstract: 249 / 250, references: 46, figures:

24 1, tables: 0

## 25 **Abstract**

## 26 **Background**

27 It remains unclear whether the COVID-19 pandemic is having an impact on suicide  
28 rates. Social distancing, economic insecurity and increasing prevalence rates of  
29 mental disorders may cause an increase in risk factors for suicide.

30

## 31 **Methods**

32 Data on suicide events in a major city in Germany, and the corresponding life years  
33 were provided by the local authorities. For the year 2020, periods without restrictions  
34 on freedom of movement and social contact were compared with periods of  
35 moderate and severe COVID-19 restrictions. To avoid distortions due to seasonal  
36 fluctuations in suicide risk, data from 2020 were compared to data from 2010 to  
37 2019.

38

## 39 **Outcomes**

40 A total of 333 suicides were registered and 2,791,131 life years (LY) were spent  
41 between 2010 and 2020. Of these, 42 suicides and 300,834 LY accounted for the  
42 year 2020.

43 In 2020, suicide rates (SR, suicides per 100,000 LY) were lower in periods with  
44 moderate (SR = 8.5,  $\chi^2 = 4.374$ ,  $p = 0.037$ ) or severe COVID-19 restrictions (SR =  
45 7.0,  $\chi^2 = 3.999$ ,  $p = 0.046$ ) compared with periods without restrictions (SR = 18.0).

46 A comparison with preceding years showed that differences cannot be attributed to  
47 seasonal variations. No age- or gender differences were found.

48

49 **Interpretation**

50 SR decreased during the COVID-19 restrictions; we expect SR to rise in the medium  
51 term. Careful monitoring of SR in the further course of the COVID-19 crisis is  
52 therefore urgently needed. The findings have regional reference and should not be  
53 over-generalized.

54

55 **Funding**

56 This study was conducted without external funding.

57

58 **Keywords**

59 Suicide, COVID-19, pandemic, restrictions, quarantine, Germany

60

61

## 62 **Introduction**

63 It remains unclear whether the COVID-19 pandemic is having an impact on suicide  
64 rates. Some predict that suicide rates will rise, since actions to contain COVID-19,  
65 such as social distancing, economic lockdown, or the temporary restructuring of the  
66 health system, could cause risk factors for suicide to increase <sup>1-5</sup>. Indeed, analyses  
67 of previous economic crises have shown that an increase in unemployment was  
68 associated with an increase in suicide rates <sup>6-10</sup>; and according to leading theories of  
69 suicide prevention, the loss of social inclusion is a major risk factor for suicide <sup>11</sup>.

70

71 In Germany, a significant restriction of the free movement of persons was agreed  
72 upon in March 2020, with the strongest restrictions coming into force in April and  
73 May. German borders were virtually closed for travel from 16 March onwards <sup>12-14</sup>.

74 On 22 March 2020, the German Federal Government and the Länder agreed on a  
75 comprehensive restriction of social contacts, which required people to reduce  
76 contacts with others (except for members of one's own household) to an absolute  
77 minimum <sup>15</sup>. In the Free State of Saxony, further restrictions on going out, and a ban  
78 on visiting care homes, were adopted on 1 April 2020 <sup>16</sup>. While the restrictions on  
79 going out were eased on 4 May, the restrictions on visiting care homes remained <sup>17</sup>.

80 Following a meeting by the EU interior ministers on 15 June, extensive freedom of  
81 movement within the EU's Schengen Area was gradually restored, but differentiated  
82 travel warnings and quarantine regulations following travel remained in place for  
83 parts of it. The German Federal Foreign Office also maintained the existing travel  
84 warnings for 160 countries until 31 August 2020 <sup>18</sup>.

85

86 Elderly people, particularly those with severe or multiple underlying health conditions,  
87 are threatened by high fatality rates of COVID-19 <sup>19</sup>, and are therefore particularly  
88 affected by the pandemic. Social distancing was practised more consistently by this  
89 age group, and older people are more often dependent on help from third parties.  
90 Thwarted belongingness and perceived burdensomeness are in turn central risk  
91 factors for suicide, according to the interpersonal theory of suicide <sup>11</sup>. In the case of  
92 senior citizens, these risk factors affect an already vulnerable age group with the  
93 highest age-related suicide rates <sup>20</sup>.

94

95 This study investigated the influence of social distancing during the COVID-19  
96 restrictions period on suicide rates (SR). We addressed the following hypotheses:

97 A. SR increased in the total population under conditions compared to periods without  
98 restrictions. This applies to both the period of travel restrictions and that of restricting  
99 social contact.

100 B. Within the 70+ age group, the risk of suicide increased more strongly than in other  
101 age groups during COVID-19 restrictions.

102 C. A comparison with previous years shows that differences in SR within 2020 are  
103 not due to seasonal differences.

104

## 105 **Methods**

106 Sample and data acquisition

107 The data on suicides are based on the City of Leipzig's cause of death statistics, and  
108 were provided by the responsible health authority for the years 2010 to 2020. Data  
109 were obtained for age ranges 0–4, 5–9, 10–14, ..., 75-79, 80–84, 85+ and for both

110 sexes. Annual population statistics were provided for the corresponding age groups  
111 by the residents' registration office of Leipzig (<https://statistik.leipzig.de/statcity/>).

112

113 Analytical strategy

114 Data were analysed using the R software version 3.3.1<sup>17</sup>, IBM SPSS 25.0<sup>18</sup>, and  
115 Microsoft Excel.

116

117 The analysis included suicides from the first six months of each of the years studied.  
118 For the year 2020, months without restrictions on freedom of movement or social  
119 contact were aggregated as period nR\_2020 (January, February), those with  
120 moderate restriction as period R1\_2020 (travel restrictions; March to June), and  
121 those with severe restrictions as period R2\_2020 (restrictions on travel, going out  
122 and social contact; April, May). To compare suicide mortality in 2020 before and  
123 during the COVID-19 restrictions, suicide cases were assigned to group nR\_2020,  
124 R1\_2020 and R2\_2020. Corresponding life-years were calculated, according to the  
125 length of the periods examined.

126

127 Life years (LY) and events were used to calculate the Risk Ratios (RR) with  
128 Incidence Rate Ratios (IRR). Differences in suicide risk between nR\_2020 and the  
129 risk groups R1\_2020 and R2\_2020 were conducted using Chi-Square tests. In order  
130 to exclude biases due to seasonal fluctuations in the suicide risk, Mantel-Haenszel  
131 statistics (MH, Test for Heterogeneity) were performed to examine the risk of suicide  
132 within the 2020 restriction periods and with the paired periods for years 2010-2019.  
133 The Test for Heterogeneity examines whether the IRR of n 2x2 tables differ. Post-  
134 hoc, Chi-Square tests were used to examine differences for each pair (nR\_2020 vs  
135 nR\_2010/19; R1\_2020 vs R1\_2010/19; R2\_2020 vs R2\_2010/19).

136

137 In order to examine age-related and gender-related differences within the 2020  
138 restriction periods, suicide risk in nR\_2020, R1\_2020 and R2\_2020 were compared  
139 between senior age (70+) vs age group 0–69 and between genders using the MH.

140

#### 141 *Ethical considerations*

142 The study was approved by the ethics committee of the medical faculty of the  
143 University Hospital Leipzig, Germany (study ID: 272/20-ek) and conducted according  
144 to the Declaration of Helsinki. This epidemiological cohort study is based on the  
145 death statistics. For methodological reasons, no informed consent can be obtained.

## 146 **Results**

147 A total of 2,791,131 LY were spent and 333 suicides were registered during the  
148 periods studied. In 2020, 18 suicides (LY: 100,278) were attributed to nR\_2020, 17  
149 (LY: 200,556) to R1\_2020, and 7 (LY: 100,278) to R2\_2020. In the previous years  
150 2010 to 2019, 90 suicides (LY: 930,377) were attributed to nR\_2010/19, 208 (LY:  
151 1,860,754) to R1\_2010/19, and 91 (LY: 930,377) to R2\_2010/19. The suicide rates  
152 within the individual periods were 18.0, 8.5, 7.0 in nR\_2020, R1\_2020, and R2\_2020,  
153 respectively.

154

155 The suicide risk in 2020 was found to be different between nR\_2020 and the periods  
156 studied of R1\_2020  $\chi^2$  [1; N = 300,869] = 4.374, p = 0.037), and R2\_2020 R2 ( $\chi^2$  [1;  
157 N = 200,581] = 3.999, p = 0.046).

158 The difference for nR compared to R1 and R2 also remained in a comparison with  
159 the previous years 2010 to 2019 (Test for Heterogeneity; periods nR vs R1: Q [df = 1]



160 = 12.233,  $p < 0.001$ ; periods nR vs R2:  $Q [df = 1] = 13.974$ ,  $p < 0.001$ ). The post hoc  
161 analysis showed that the described difference was due to high suicide rates in  
162 nR\_2020 compared to nR\_2010/19. The periods R1\_2020 and R2\_2020 were not  
163 different compared to the previous years.

164

165 For details, see Figure 1.

166 < insert Figure 1 about here >

167

168 No gender- or age-related differences were demonstrated between R\_2020,  
169 R1\_2020, and R2\_2020.

170

## 171 **Discussion**

172 Our hypotheses regarding suicide rates increasing during corona restrictions could  
173 not be confirmed. On the contrary, we found lower suicide rates during the pandemic  
174 restrictions in 2020 compared to previous months. However, a comparison with  
175 preceding years showed that this difference in 2020 was mainly caused by high  
176 suicide rates in the period without restrictions.

177

178 Results represent local suicide trends during the COVID-19 pandemic in a major city  
179 in Saxony. In Saxony, as in most regions of Germany, the prevalence and mortality  
180 rates of COVID-19 were comparatively low, with 135.8 and 251.0 cases per 100,000  
181 inhabitants, respectively<sup>24</sup>. The regional shut-down was much less restrictive than in  
182 other European countries, i.e. United Kingdom, France, Spain or Italy. At an early

183 stage of the pandemic, the German government committed to support measures to  
184 prevent insolvencies and unemployment. Accordingly, results should be evaluated  
185 under these external conditions. Regional differences in the COVID-19 pandemic  
186 may produce regional differences in the mental health situation, economic crises and  
187 suicide rates. The findings of this study should not, therefore, be extrapolated  
188 uncritically to other regions or countries. It should not be assumed either that the  
189 trend described will remain stable. This study only provides a first regional snapshot.

190

191 The COVID-19 pandemic is a new phenomenon. Thus, it is not surprising, that little  
192 scientific evidence of suicide trends during the COVID-19 pandemic exist. A number  
193 of case reports describes a co-occurrence of suicidal behaviour and COVID-19, with  
194 the underlying factors being fear of infection <sup>25-27</sup> or severe mental disorders such as  
195 hallucinations or delusions <sup>28-30</sup>. However, trends in suicide risks cannot be  
196 concluded from case reports or case series.

197

198 Projections based on underlying risk factors for suicide, such as unemployment,  
199 indicate rising suicide rates during the COVID-19 pandemic <sup>1,2</sup>. This does not  
200 contradict the reduced suicide risk found in our study, since unemployment has not  
201 yet risen in the region investigated. It illustrates, however, that suicide rates will not  
202 increase immediately, but possibly only with a time lag.

203

204 This is consistent with studies reporting no increase in suicidal behaviour, used as an  
205 indirect measure for suicide risk, in the early stages of the COVID-19 pandemic <sup>31-37</sup>.  
206 For instance, online surveys showed a decrease in suicidal thoughts and intention  
207 during the pandemic; presentation at emergency departments due to suicidal ideation

208 decreased <sup>36</sup>, suicides in selective autopsy samples remained low <sup>37</sup>, and search  
209 engine users entered suicide-related terms less frequently <sup>31-33,35</sup>. However, the  
210 overall results are inhomogeneous, since other surveys indicate a high prevalence of  
211 suicidal thoughts during the pandemic, in particular under quarantine conditions <sup>3,38-</sup>  
212 <sup>41</sup>.

213

214 The findings have led us to change our initial hypothesis. We predict the pandemic  
215 will see the following course of suicide rates; this will need to be verified in future  
216 studies: In an initial phase, the pandemic was perceived as an incalculable new  
217 threat without any social countermeasures being taken. In this phase of individual  
218 disorientation, suicide rates were unusually high.

219 In a second phase, with the COVID-19 restrictions, a social response to the threat  
220 was given. Rules were established to protect the most vulnerable individuals and to  
221 slow down the spread of the virus. The omnipresent concern for the well-being of  
222 fellow human beings led to an increased sense of social belonging despite physical  
223 distance. According to Durkheim's theory, a temporary increase of social integration  
224 and cohesion results in a reduction in suicide rates <sup>42</sup>. Some findings observed during  
225 the Second World War and the 9/11 terror attacks support this hypothesis, but it  
226 remains controversial <sup>43-45</sup>.

227 In a third phase, the pandemic could be perceived as more predictable and less  
228 threatening. The feeling of belonging may once again be increasingly determined by  
229 the quality and quantity of everyday contacts, which could continue to be reduced  
230 depending on the regulations. A rise in loneliness, unemployment and mental  
231 disorders may lead to a delayed increase in the suicide rates in the medium term. As  
232 other authors have stressed, it is important to distinguish between physical distance

233 and social belonging<sup>46</sup>. A major challenge for suicide prevention during the COVID-  
234 19 pandemic is to find an answer to the following question: How can we succeed in  
235 maintaining a sense of social belonging in our society if physical distance persists in  
236 the medium term?

237

## 238 **Conclusion**

239 In the population studied, suicide rates decreased during the COVID-19 restrictions,  
240 but we expect suicide rates to increase with a time delay. Careful monitoring of  
241 suicide rates in the further course of the COVID-19 crisis is therefore essential.  
242 Accordingly, further investigations and meta-analytical approaches are urgently  
243 required to monitor suicide rates. In this sense, the available results represent a first  
244 step in this direction.

245

## 246 **Limitations and strengths**

247 This study reports first data on suicide trends during the COVID-19 pandemic. The  
248 investigated quarantine period covers only six months and the population studied is  
249 relatively small with 0.5 M persons. These findings allow conclusions to be drawn for  
250 the region and time period investigated. The results do not allow a supra-regional  
251 evaluation or assessment of medium-term trends in suicide rates.

252

## 253 **Acknowledgements**

254 We would like to thank the Leipzig Health Authority for their support and fast  
255 provision of relevant data sets. We would also like to thank Monica Buckland for her

256 valuable support in proofreading.

257

258 **Figures and Tables**

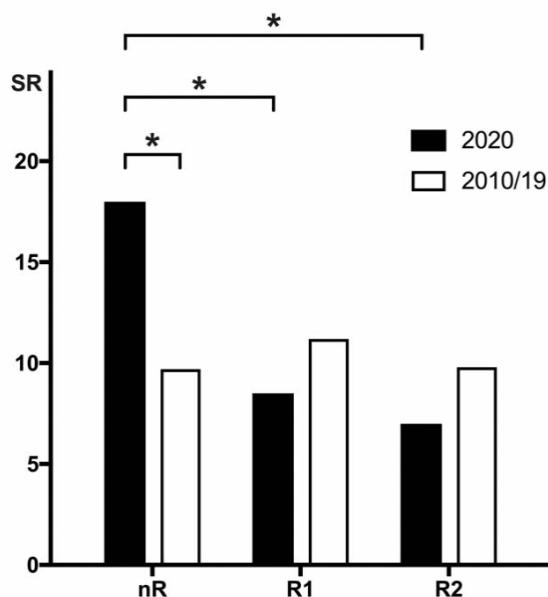

|            | nR      |         | R1      |           | R2      |         |
|------------|---------|---------|---------|-----------|---------|---------|
|            | 2020    | 2010/19 | 2020    | 2010/19   | 2020    | 2010/19 |
| <b>S</b>   | 18      | 90      | 17      | 208       | 7       | 91      |
| <b>Pop</b> | 100,278 | 930,377 | 200,556 | 1,860,754 | 100,278 | 930,377 |

259

260

261 **Figure 1: Suicide rates before and during COVID-19 restrictions.**

262 This displays the suicide rates (SR, suicides per 100,000 life years) in 2020 (black columns) and the average SR  
 263 of the years 2010–2019 (white columns). nR = period in 2020 without COVID-19 restrictions (and corresponding  
 264 periods in previous years), R1 = period of moderate restrictions, R2 = period of severe restrictions. Asterisks  
 265 indicate significant differences ( $p < 0.05$ ) in the underlying suicide numbers and population sizes based on Chi-  
 266 Square statistics. S = suicide numbers, Pop = population sizes (life years).

267

268 **References**

269

- 270 1 McIntyre RS, Lee Y. Projected increases in suicide in Canada as a consequence of  
271 COVID-19. *Psychiatry Res* 2020; **290**: 113104.  
272 <https://doi.org/10.1016/j.psychres.2020.113104>.
- 273 2 McIntyre RS, Lee Y. Preventing suicide in the context of the COVID-19 pandemic. *World*  
274 *Psychiatry* 2020; **19**: 250–51. <https://doi.org/10.1002/wps.20767>.
- 275 3 Fitzpatrick KM, Harris C, Drawve G. How bad is it? Suicidality in the middle of the  
276 COVID-19 pandemic. *Suicide Life Threat Behav* 2020. <https://doi.org/10.1111/sltb.12655>.
- 277 4 Kawohl W, Nordt C. COVID-19, unemployment, and suicide. *The Lancet Psychiatry*  
278 2020; **7**: 389–90. [https://doi.org/10.1016/S2215-0366\(20\)30141-3](https://doi.org/10.1016/S2215-0366(20)30141-3).
- 279 5 Wand APF, Zhong B-L, Chiu HFK, Draper B, Leo D de. COVID-19: the implications for  
280 suicide in older adults. *Int Psychogeriatr* 2020: 1–6.  
281 <https://doi.org/10.1017/S1041610220000770>.
- 282 6 Nordt C, Warnke I, Seifritz E, Kawohl W. Modelling suicide and unemployment: a  
283 longitudinal analysis covering 63 countries, 2000-11. *Lancet Psychiatry* 2015; **2**: 239–45.  
284 [https://doi.org/10.1016/S2215-0366\(14\)00118-7](https://doi.org/10.1016/S2215-0366(14)00118-7).
- 285 7 Oyesanya M, Lopez-Morinigo J, Dutta R. Systematic review of suicide in economic  
286 recession. *World J Psychiatry* 2015; **5**: 243–54. <https://doi.org/10.5498/wjp.v5.i2.243>.
- 287 8 Alicandro G, Malvezzi M, Gallus S, La Vecchia C, Negri E, Bertuccio P. Worldwide  
288 trends in suicide mortality from 1990 to 2015 with a focus on the global recession time  
289 frame. *Int J Public Health* 2019; **64**: 785–95. <https://doi.org/10.1007/s00038-019-01219->  
290 [y](https://doi.org/10.1007/s00038-019-01219-y).
- 291 9 Huikari S, Miettunen J, Korhonen M. Economic crises and suicides between 1970 and  
292 2011: time trend study in 21 developed countries. *J Epidemiol Community Health* 2019;  
293 **73**: 311–16. <https://doi.org/10.1136/jech-2018-210781>.
- 294 10 Rachiotis G, Stuckler D, McKee M, Hadjichristodoulou C. What has happened to suicides  
295 during the Greek economic crisis? Findings from an ecological study of suicides and their  
296 determinants (2003-2012). *BMJ Open* 2015; **5**: e007295. <https://doi.org/10.1136/bmjopen->  
297 [2014-007295](https://doi.org/10.1136/bmjopen-2014-007295).
- 298 11 van Orden KA, Witte TK, Cukrowicz KC, Braithwaite SR, Selby EA, Joiner TE. The  
299 interpersonal theory of suicide. *Psychol Rev* 2010; **117**: 575–600.  
300 <https://doi.org/10.1037/a0018697>.
- 301 12 Federal Ministry of the Interior. Vorübergehende Grenzkontrollen an den Binnengrenzen  
302 zu Österreich, der Schweiz, Frankreich, Luxemburg und Dänemark. Press release of  
303 15.03.2020, 2020.
- 304 13 Federal Ministry of the Interior. Bundesinnenminister Seehofer ordnet weitreichende  
305 Reisebeschränkungen im internationalen Luft- und Seeverkehr an. Press release of  
306 17.03.2020., 2020.
- 307 14 Federal Ministry of the Interior. Bundesinnenminister Horst Seehofer weitet  
308 Binnengrenzkontrollen auf den innereuropäischen Luft- und Seeverkehr aus. Press  
309 release of 18.03.2020., 2020.
- 310 15 Die Bundesregierung. Besprechung der Bundeskanzlerin mit den Regierungschefinnen  
311 und Regierungschefs der Länder. Erweiterung der beschlossenen Leitlinien zur  
312 Beschränkung sozialer Kontakte. <https://www.bundesregierung.de/breg->  
313 [de/themen/coronavirus/besprechung-der-bundeskanzlerin-mit-den-regierungschefinnen-](https://www.bundesregierung.de/breg-de/themen/coronavirus/besprechung-der-bundeskanzlerin-mit-den-regierungschefinnen-und-regierungschefs-der-laender-1733248)  
314 [und-regierungschefs-der-laender-1733248](https://www.bundesregierung.de/breg-de/themen/coronavirus/besprechung-der-bundeskanzlerin-mit-den-regierungschefinnen-und-regierungschefs-der-laender-1733248) (accessed Aug 13, 2020).
- 315 16 German Federal Government. Besprechung der Bundeskanzlerin mit den  
316 Regierungschefinnen und Regierungschefs der Länder am 22. März 2020, 2020.
- 317 17 Free State of Saxony. Verordnung des Sächsischen Staatsministeriums für Soziales und  
318 Gesellschaftlichen Zusammenhalt zum Schutz vor dem Coronavirus SARS-CoV-2 und  
319 COVID-19. Sächsische Corona-Schutz-Verordnung – SächsCoronaSchVO. *Sächsisches*  
320 *Gesetz- und Verordnungsblatt* 02.05.2020: § 10 (1).

- 321 18 Federal Foreign Office. Außenminister Maas zum Kabinettsbeschluss über die  
322 Verlängerung der weltweiten reisewarnung bis zum 31.08. press release.  
323 <https://www.auswaertiges-amt.de/de/newsroom/weltweite-reisewarnung/2348120>.
- 324 19 Kang SJ, Jung SI. Age-Related Morbidity and Mortality among Patients with COVID-19.  
325 *Infect Chemother* 2020; **52**: 154–64. <https://doi.org/10.3947/ic.2020.52.2.154>.
- 326 20 Federal Statistical Office (Destatis) Germany. Cause of death statistics (accessed Mar 20,  
327 2020).
- 328 21 R Core Team. R: A Language and Environment for Statistical Computing. Vienna,  
329 Austria: R Foundation for Statistical Computing, 2016.
- 330 22 IBM Corp. IBM SPSS Statistics for Windows. Armonk, NY: IBM Corp., 2019.
- 331 23 Tarone RE. On heterogeneity tests based on efficient scores. *Biometrika* 1985; **72**: 91–95.  
332 <https://doi.org/10.1093/biomet/72.1.91>.
- 333 24 Robert Koch Institut. Coronavirus SARS-CoV-2. Daily situation reports in German and  
334 English (31.07.2020).  
335 [https://www.rki.de/DE/Content/InfAZ/N/Neuartiges\\_Coronavirus/Fallzahlen.html](https://www.rki.de/DE/Content/InfAZ/N/Neuartiges_Coronavirus/Fallzahlen.html).
- 336 25 Mamun MA, Bodrud-Doza M, Griffiths MD. Hospital suicide due to non-treatment by  
337 healthcare staff fearing COVID-19 infection in Bangladesh? *Asian J Psychiatr* 2020; **54**:  
338 102295. <https://doi.org/10.1016/j.ajp.2020.102295>.
- 339 26 Mamun MA, Griffiths MD. First COVID-19 suicide case in Bangladesh due to fear of  
340 COVID-19 and xenophobia: Possible suicide prevention strategies. *Asian J Psychiatr*  
341 2020; **51**: 102073. <https://doi.org/10.1016/j.ajp.2020.102073>.
- 342 27 Dsouza DD, Quadros S, Hyderabadwala ZJ, Mamun MA. Aggregated COVID-19 suicide  
343 incidences in India: Fear of COVID-19 infection is the prominent causative factor.  
344 *Psychiatry Res* 2020; **290**: 113145. <https://doi.org/10.1016/j.psychres.2020.113145>.
- 345 28 Weise J, Schomerus G, Speerforck S. Die SARS-CoV-2-Pandemie und ein Suizidversuch  
346 bei wahnhafter Störung. *Psychiatr Prax* 2020; **47**: 218–20. <https://doi.org/10.1055/a-1158-1745>.
- 347
- 348 29 Zhang K, Shi Y, Liu H, Hashimoto K. A Case Report of Suicide Attempt Caused by  
349 Acute and Transient Psychotic Disorder during the COVID-19 Outbreak. *Case Rep*  
350 *Psychiatry* 2020; **2020**: 4320647. <https://doi.org/10.1155/2020/4320647>.
- 351 30 Mirza J, Ganguly A, Ostrovskaya A, Tusher A, Viswanathan R. Command Suicidal  
352 Hallucination as Initial Presentation of Coronavirus Disease 2019 (COVID-19): A Case  
353 Report. *Psychosomatics* 2020. <https://doi.org/10.1016/j.psym.2020.05.022>.
- 354 31 Halford EA, Lake AM, Gould MS. Google searches for suicide and suicide risk factors in  
355 the early stages of the COVID-19 pandemic. *PLoS ONE* 2020; **15**: e0236777.  
356 <https://doi.org/10.1371/journal.pone.0236777>.
- 357 32 Jacobson NC, Lekkas D, Price G, et al. Flattening the Mental Health Curve: COVID-19  
358 Stay-at-Home Orders Are Associated With Alterations in Mental Health Search Behavior  
359 in the United States. *JMIR Ment Health* 2020; **7**: e19347. <https://doi.org/10.2196/19347>.
- 360 33 Knipe D, Evans H, Marchant A, Gunnell D, John A. Mapping population mental health  
361 concerns related to COVID-19 and the consequences of physical distancing: a Google  
362 trends analysis. *Wellcome Open Res* 2020; **5**: 82.  
363 <https://doi.org/10.12688/wellcomeopenres.15870.2>.
- 364 34 Hamm ME, Brown PJ, Karp JF, et al. Experiences of American Older Adults with Pre-  
365 existing Depression During the Beginnings of the COVID-19 Pandemic: A Multicity,  
366 Mixed-Methods Study. *Am J Geriatr Psychiatry* 2020.  
367 <https://doi.org/10.1016/j.jagp.2020.06.013>.
- 368 35 Sinyor M, Spittal MJ, Niederkrotenthaler T. Changes in Suicide and Resilience-related  
369 Google Searches during the Early Stages of the COVID-19 Pandemic. *Can J Psychiatry*  
370 2020: 706743720933426. <https://doi.org/10.1177/0706743720933426>.



- 371 36 Smalley CM, Malone DA, Meldon SW, et al. The impact of COVID-19 on suicidal  
372 ideation and alcohol presentations to emergency departments in a large healthcare system.  
373 *Am J Emerg Med* 2020. <https://doi.org/10.1016/j.ajem.2020.05.093>.
- 374 37 Sakelliadis EI, Katsos KD, Zouzia EI, Spiliopoulou CA, Tsiodras S. Impact of Covid-19  
375 lockdown on characteristics of autopsy cases in Greece. Comparison between 2019 and  
376 2020. *Forensic Sci Int* 2020; **313**: 110365. <https://doi.org/10.1016/j.forsciint.2020.110365>.
- 377 38 Xin M, Luo S, She R, et al. Negative cognitive and psychological correlates of mandatory  
378 quarantine during the initial COVID-19 outbreak in China. *Am Psychol* 2020; **75**: 607–17.  
379 <https://doi.org/10.1037/amp0000692>.
- 380 39 Gratz KL, Tull MT, Richmond JR, Edmonds KA, Scamaldo KM, Rose JP. Thwarted  
381 belongingness and perceived burdensomeness explain the associations of COVID-19  
382 social and economic consequences to suicide risk. *Suicide Life Threat Behav* 2020.  
383 <https://doi.org/10.1111/sltb.12654>.
- 384 40 Patsali ME, Mousa D-PV, Papadopoulou EVK, et al. University students' changes in  
385 mental health status and determinants of behavior during the COVID-19 lockdown in  
386 Greece. *Psychiatry Res* 2020; **292**: 113298.  
387 <https://doi.org/10.1016/j.psychres.2020.113298>.
- 388 41 Li D-J, Ko N-Y, Chen Y-L, et al. COVID-19-Related Factors Associated with Sleep  
389 Disturbance and Suicidal Thoughts among the Taiwanese Public: A Facebook Survey. *Int*  
390 *J Environ Res Public Health* 2020; **17**. <https://doi.org/10.3390/ijerph17124479>.
- 391 42 Durkheim E. Suicide: A study in sociology. New York: The Free Press, 1867 / 1951.
- 392 43 Claassen CA, Carmody T, Stewart SM, et al. Effect of 11 September 2001 terrorist attacks  
393 in the USA on suicide in areas surrounding the crash sites. *Br J Psychiatry* 2010; **196**:  
394 359–64. <https://doi.org/10.1192/bjp.bp.109.071928>.
- 395 44 Lange AW de, Neeleman J. The effect of the September 11 terrorist attacks on suicide and  
396 deliberate self-harm: a time trend study. *Suicide Life Threat Behav* 2004; **34**: 439–47.  
397 <https://doi.org/10.1521/suli.34.4.439.53744>.
- 398 45 Henderson R, Stark C, Humphry RW, Selvaraj S. Changes in Scottish suicide rates during  
399 the Second World War. *BMC Public Health* 2006; **6**: 167. [https://doi.org/10.1186/1471-](https://doi.org/10.1186/1471-2458-6-167)  
400 [2458-6-167](https://doi.org/10.1186/1471-2458-6-167).
- 401 46 Wasserman D, van der Gaag R, Wise J. The term "physical distancing" is recommended  
402 rather than "social distancing" during the COVID-19 pandemic for reducing feelings of  
403 rejection among people with mental health problems. *Eur. psychiatr.* 2020; **63**: e52.  
404 <https://doi.org/10.1192/j.eurpsy.2020.60>.
- 405



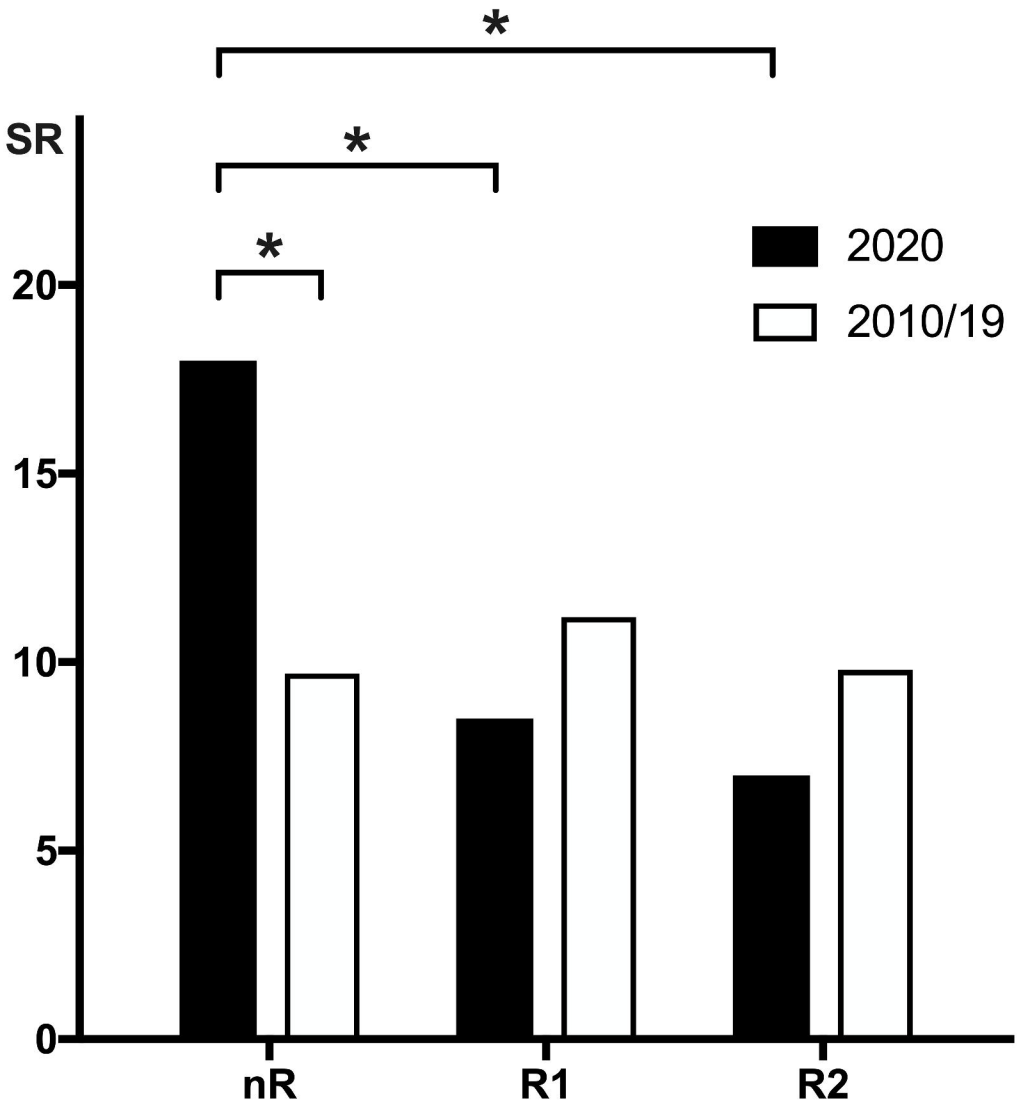

|     | nR      |         | R1      |           | R2      |         |
|-----|---------|---------|---------|-----------|---------|---------|
|     | 2020    | 2010/19 | 2020    | 2010/19   | 2020    | 2010/19 |
| S   | 18      | 90      | 17      | 208       | 7       | 91      |
| Pop | 100,278 | 930,377 | 200,556 | 1,860,754 | 100,278 | 930,377 |
